# Supplementary material for: A multifunctional microporous metal–organic framework: efficient adsorption of iodine and column-chromatographic dye separation
Source: Royal Society of Chemistry journal article supplement (doi:10.1039/c8ra04648d), 2018-01-01
Supplement: c8ra04648d1.pdf [file c8ra04648d1.pdf]

## Supplementary Information

### **A Multifunctional Microporous Metal–Organic Framework: Efficient Adsorption of Iodine and Column-chromatographic Dye Separation**

**Chan Yao,<sup>a</sup> Wei Wang,<sup>a</sup> Shu-Ran Zhang,<sup>a</sup> Hui-Ying Li,<sup>a</sup> Yan-Hong Xu,<sup>\*a,b</sup>**

**Zhong-Min Su<sup>c</sup> and Guang-Bo Che<sup>\*a</sup>**

<sup>a</sup> Key Laboratory of Preparation and Applications of Environmental Friendly Materials (Jilin Normal University), Ministry of Education, Changchun 130103, Jilin, People's Republic of China

<sup>b</sup> Key Laboratory of Functional Materials Physics and Chemistry of the Ministry of Education, Jilin Normal University, Siping 136000, Jilin, People's Republic of China

<sup>c</sup> Institute of Functional Material Chemistry, Faculty of Chemistry, Northeast Normal University, Changchun, 130024, Jilin, People's Republic of China

**Table S1** Crystal data and structure refinements for **JLNU-4**.

| Identification code                                             | <b>JLNU-4</b>                                                                  |
|-----------------------------------------------------------------|--------------------------------------------------------------------------------|
| Formula                                                         | C <sub>36</sub> H <sub>51</sub> N <sub>7</sub> O <sub>15</sub> Cd <sub>2</sub> |
| Formula weight                                                  | 1046.65                                                                        |
| Crystal system                                                  | Monoclinic                                                                     |
| Space group                                                     | <i>P2</i> <sub>1</sub> / <i>c</i>                                              |
| <i>a</i> (Å)                                                    | 14.3590(9)                                                                     |
| <i>b</i> (Å)                                                    | 14.4350(10)                                                                    |
| <i>c</i> (Å)                                                    | 22.6110(14)                                                                    |
| $\alpha$ (°)                                                    | 90                                                                             |
| $\beta$ (°)                                                     | 98.6970(11)                                                                    |
| $\gamma$ (°)                                                    | 90                                                                             |
| <i>V</i> (Å <sup>3</sup> )                                      | 4632.7(5)                                                                      |
| <i>Z</i>                                                        | 4                                                                              |
| <i>D</i> <sub>calcd</sub> [g cm <sup>-3</sup> ]                 | 1.001                                                                          |
| <i>F</i> (000)                                                  | 1360                                                                           |
| Reflections collected                                           | 25012 / 9129                                                                   |
| <i>R</i> (int)                                                  | 0.0463                                                                         |
| Goodness-of-fit on <i>F</i> <sup>2</sup>                        | 1.097                                                                          |
| <i>R</i> <sub>1</sub> <sup>a</sup> [ <i>I</i> > 2σ( <i>I</i> )] | 0.0781                                                                         |
| <i>wR</i> <sub>2</sub> <sup>b</sup>                             | 0.2803                                                                         |

$${}^a R_1 = \sum \|F_o\| - |F_c| / \sum |F_o|, \quad {}^b wR_2 = \left| \sum w(|F_o|^2 - |F_c|^2) \right| / \sum |w(F_o^2)|^{1/2}.$$

**Table S2** The selected bond lengths for **JLNU-4**.

| <b>JLNU-4</b> |          |             |           |
|---------------|----------|-------------|-----------|
| O(1)-Cd(1)    | 2.301(6) | O(6)-Cd(2)  | 2.244(7)  |
| O(1)-Cd(2)    | 2.307(6) | O(7)-Cd(1)  | 2.276(7)  |
| O(2)-Cd(1)    | 2.570(7) | O(8)-Cd(2)  | 2.308(9)  |
| O(3)-Cd(1)    | 2.415(6) | O(9)-Cd(2)  | 2.235(12) |
| O(4)-Cd(1)    | 2.276(6) | O(10)-Cd(2) | 2.235(8)  |
| O(5)-Cd(1)    | 2.213(6) | O(11)-Cd(2) | 2.269(13) |

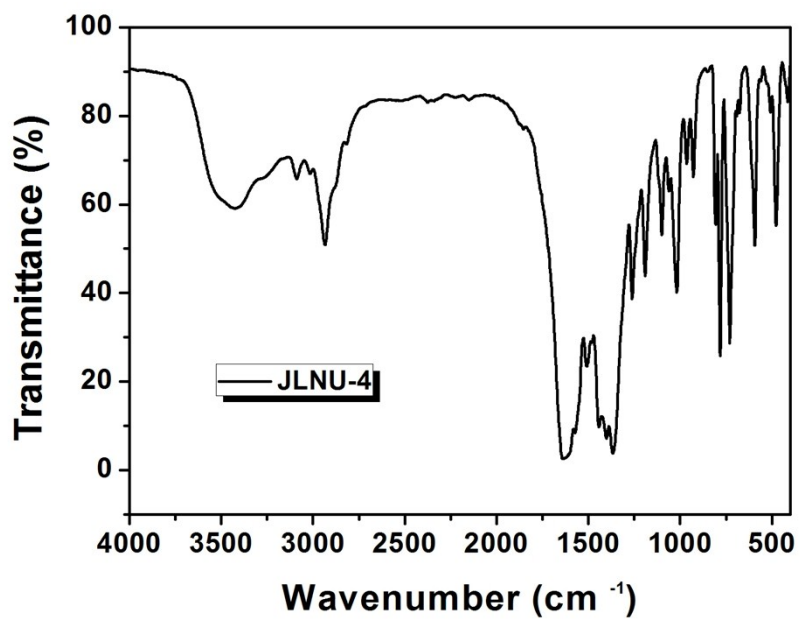

Fig. S1 The IR spectrum of JLNU-4 in KBr pellets from 4000  $\text{cm}^{-1}$  to 400  $\text{cm}^{-1}$ .

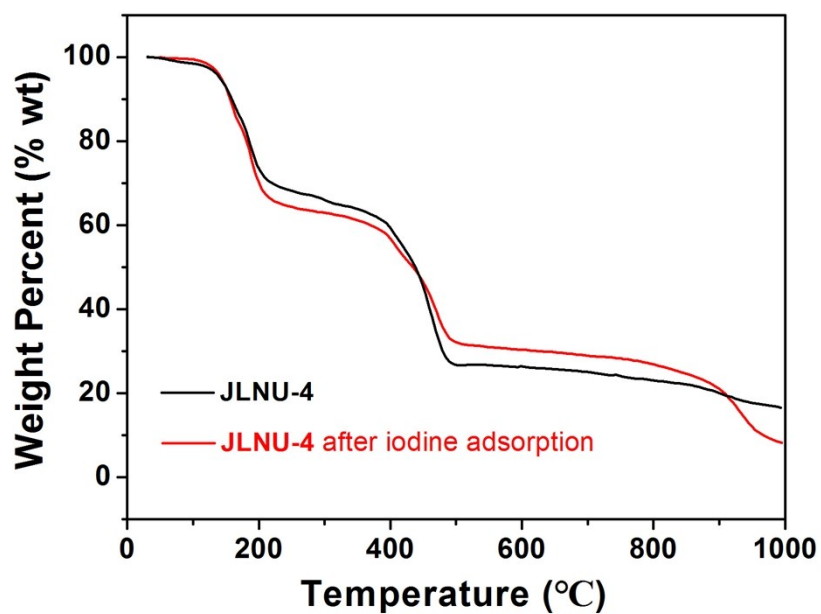

Fig. S2 The TGA curve of (a) JLNU-4 and (b) JLNU-4 after iodine adsorption measured under  $\text{N}_2$  atmosphere from 40 to 1000  $^{\circ}\text{C}$  at the heating rate of 10  $^{\circ}\text{C}\cdot\text{min}^{-1}$ .

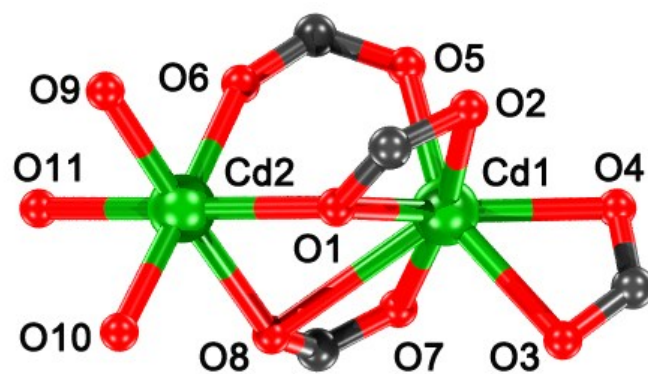

**Fig. S3** Ball-and-stick representation of a binuclear  $[\text{Cd}_2(\text{CO})_4(\text{H}_2\text{O})_2(\text{DMA})]$  cluster in JLNU-4.

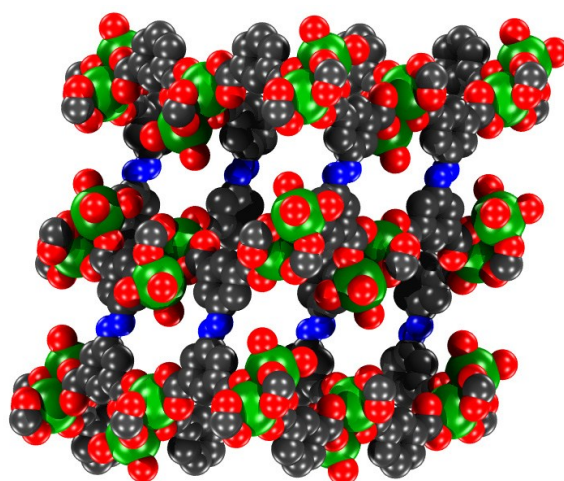

**Fig. S4** Space-filling representation of the packing arrangement for the 3D structure in JLNU-4.

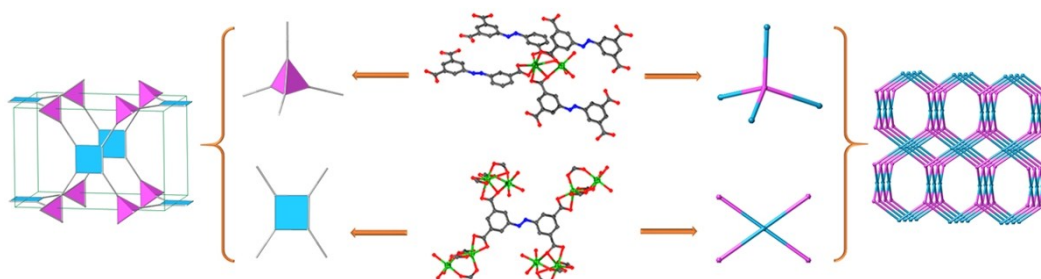

**Fig. S5** Polyhedral and ball-and-stick view of the (4,4)-connected topology network in JLNU-4.

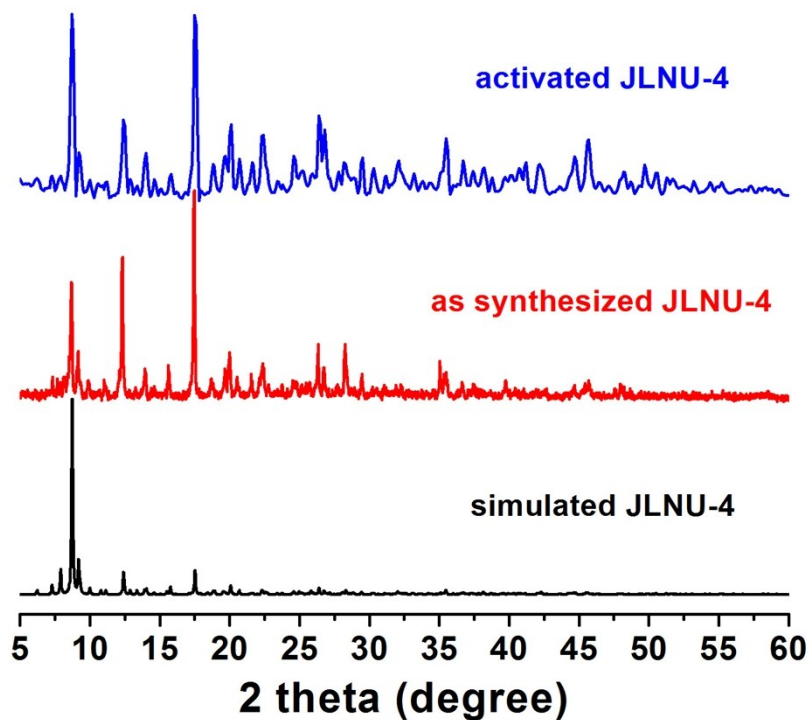

**Fig. S6** PXRD patterns of simulated JLNU-4 (black), as-synthesized JLNU-4 (red) and activated JLNU-4 (blue).

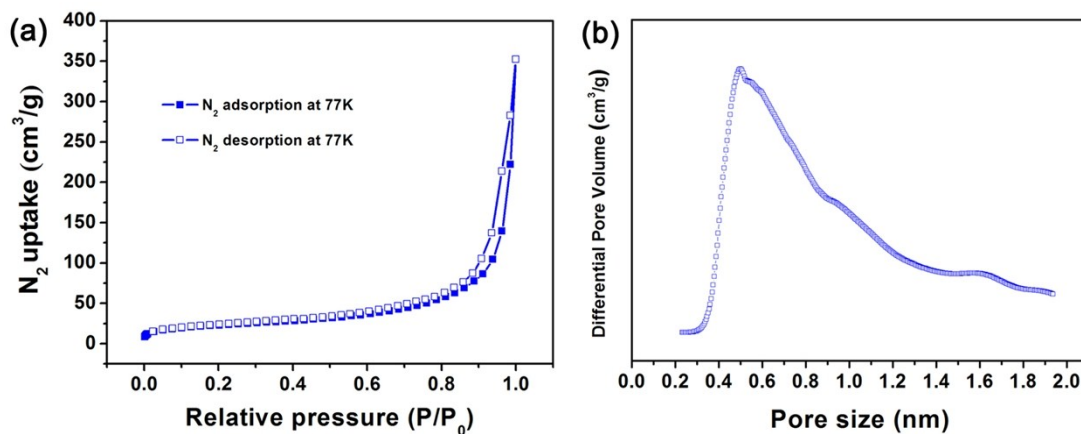

**Fig. S7** (a) The  $N_2$  gas-sorption isotherms of JLNU-4 measured at 77 K, 1 atm. (b) The pore size distribution of JLNU-4 calculated using density functional theory (DFT) method.

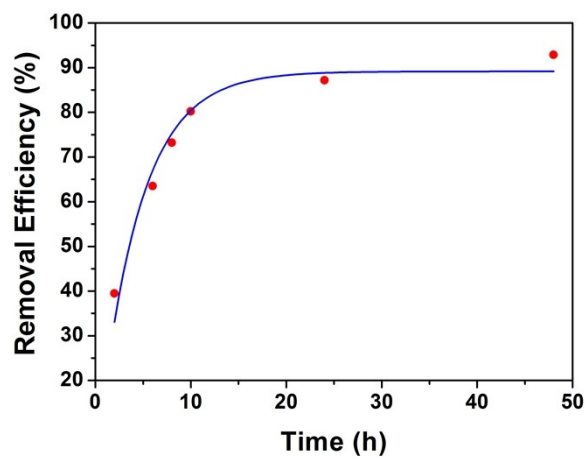

**Fig. S8** The iodine adsorption kinetic was analyzed by the pseudo-first-order kinetic model. The initial concentration of iodine solution is  $4 \text{ mg}\cdot\text{mL}^{-1}$ .

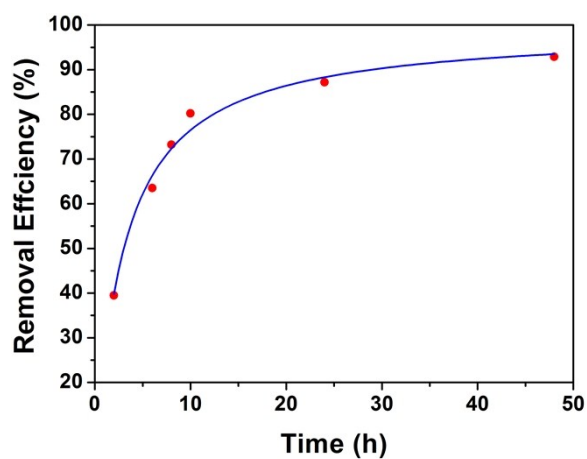

**Fig. S9** The iodine adsorption kinetic was analyzed by the pseudo-second-order kinetic model. The initial concentration of iodine solution is  $4 \text{ mg}\cdot\text{mL}^{-1}$ .

**Table S3** Parameters of the iodine adsorption kinetic analyzed by the pseudo-first-order model and pseudo-second-order model for **JLNU-4**.

| Pseudo-first-order            |                   |         | Pseudo-second-order           |                   |        |
|-------------------------------|-------------------|---------|-------------------------------|-------------------|--------|
| $k_1 \text{ (h}^{-1}\text{)}$ | $Q_e \text{ (%)}$ | $R^2$   | $k_2 \text{ (h}^{-1}\text{)}$ | $Q_e \text{ (%)}$ | $R^2$  |
| 0.2318                        | 89.166            | 0.95034 | 0.00337                       | 99.3008           | 0.9837 |

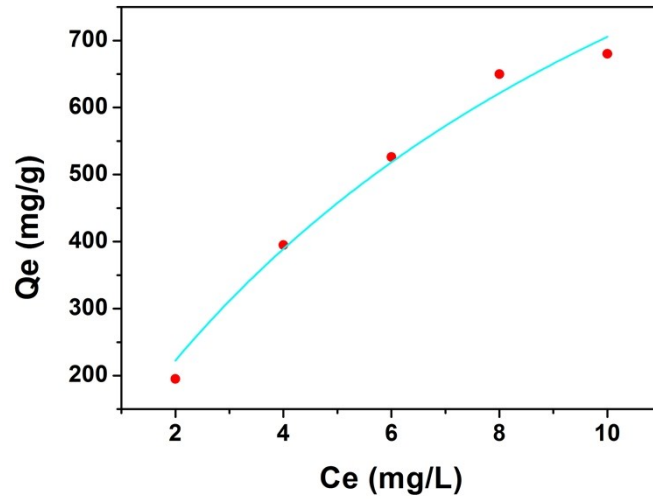

**Fig. S10** The Langmuir adsorption isotherm of the iodine adsorption for **JLNU-4**.

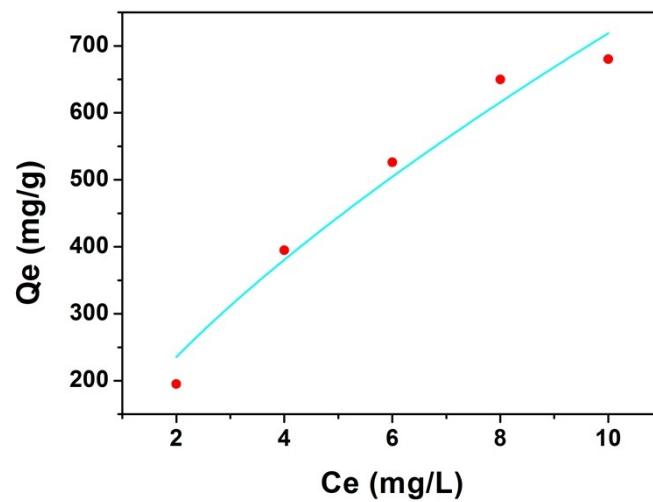

**Fig. S11** The Freundlich adsorption isotherm of the iodine adsorption for **JLNU-4**.

**Table S4** Parameters of two different simulation models extracted from experimental adsorption isotherms data for **JLNU-4**.

| Langmuir adsorption isotherm |                           |         | Freundlich adsorption isotherm |         |         |
|------------------------------|---------------------------|---------|--------------------------------|---------|---------|
| $Q_m$ (mg·g <sup>-1</sup> )  | $k_L$ (mg <sup>-1</sup> ) | $R^2$   | $k_F$ (mg <sup>-1</sup> )      | n       | $R^2$   |
| 1540.464                     | 0.08449                   | 0.98043 | 145.484                        | 1.44124 | 0.95821 |

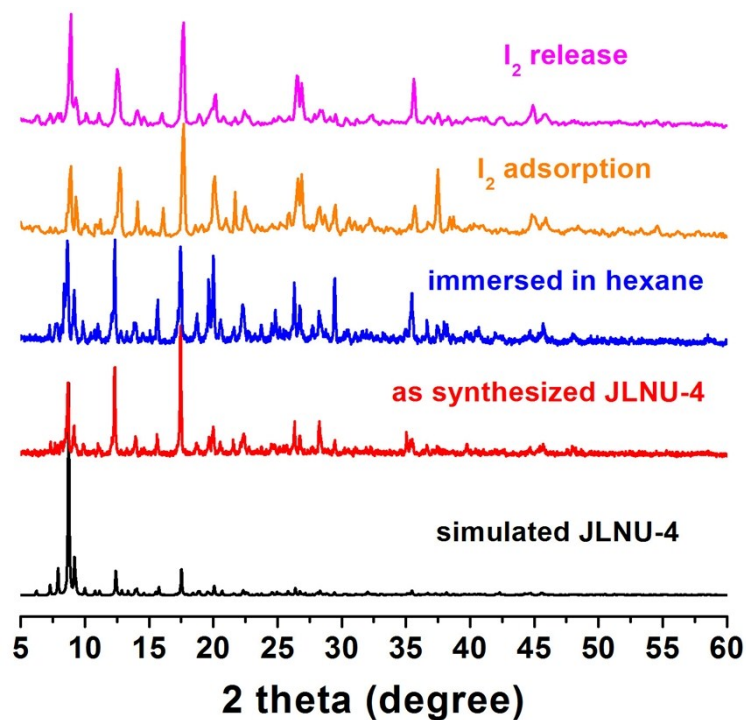

**Fig. S12** PXRD patterns of simulated **JLNU-4** (black), as-synthesized **JLNU-4** (red), immersed in hexane solution (blue), as-synthesized **JLNU-4** after iodine adsorption and release.

**Table S5** The gravimetric measurement of **JLNU-4** during the iodine adsorption in vapor phase at a time interval.<sup>a</sup>

| Time interval | Weight (g) |
|---------------|------------|
| 0             | 5.8156     |
| 2             | 5.8266     |
| 4             | 5.8301     |
| 6             | 5.8330     |
| 8             | 5.8339     |
| 10            | 5.8347     |
| 12            | 5.8347     |
| 14            | 5.8348     |

<sup>a</sup>The weight measured at a time interval was the total mass of **JLNU-4** and the vessel, in which the initial weight of **JLNU-4** was 30 mg.



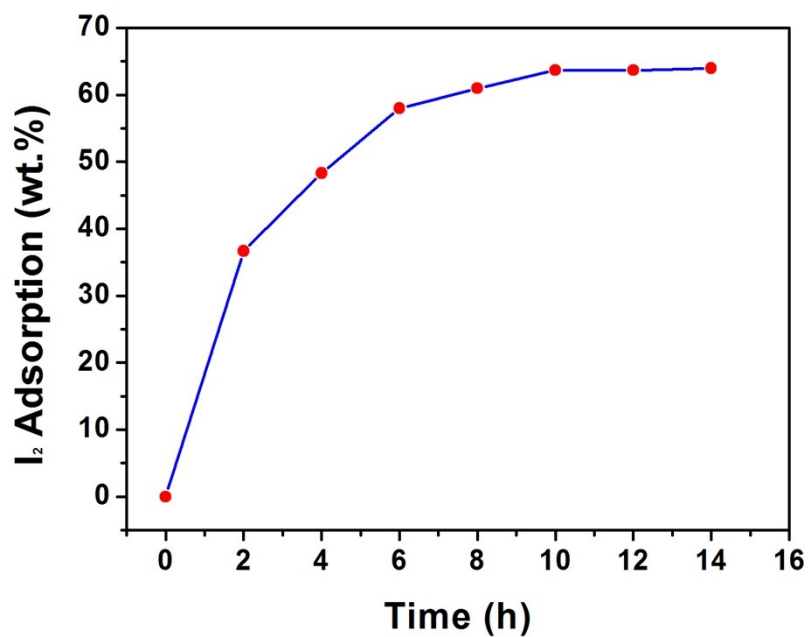

Fig. S13 Gravimetric uptake of iodine for JLNU-4 as a function of time at 350 K.

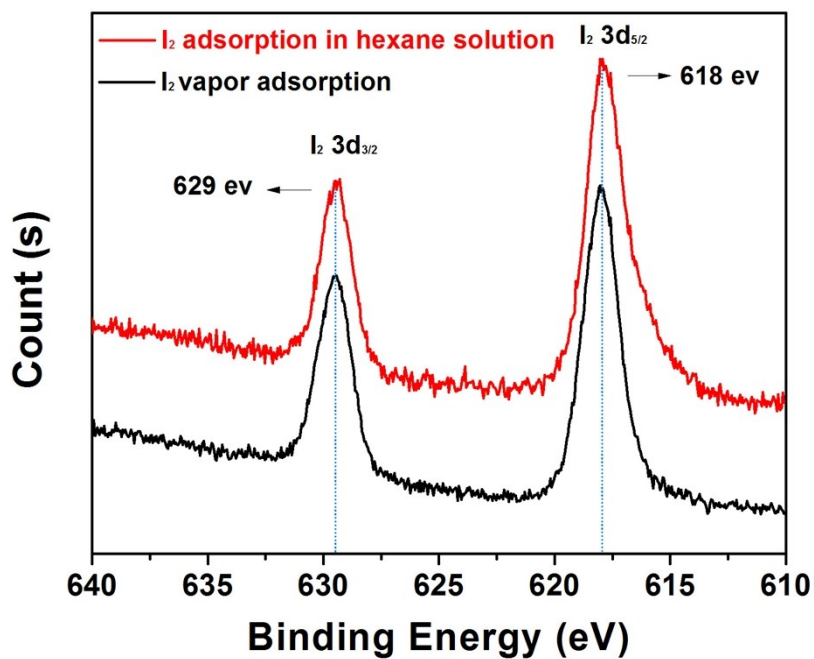

Fig. S14 XPS spectrum of JLNU-4 after iodine adsorption in hexane solution and iodine vapor adsorption, respectively.

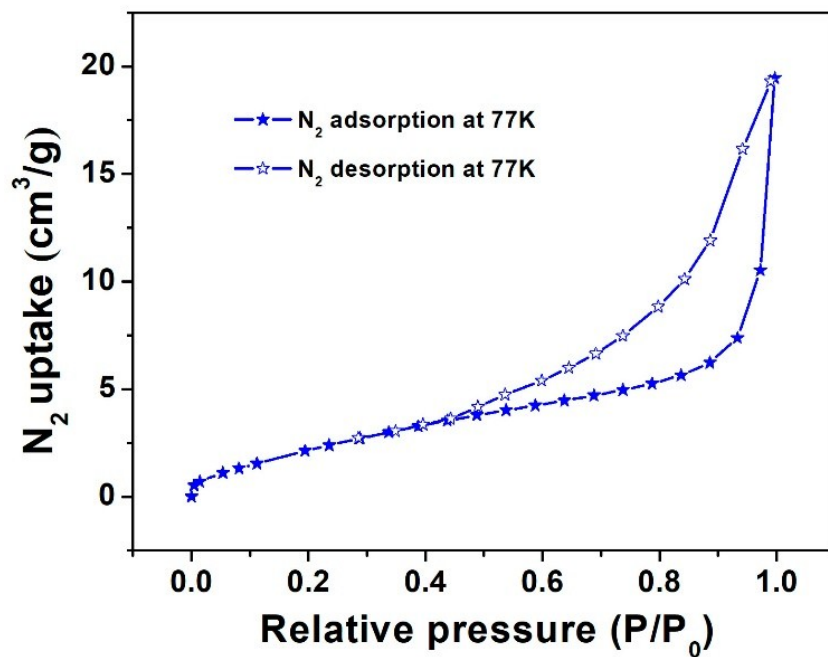

Fig. S15 The N<sub>2</sub> gas-sorption isotherms of MB loaded JLNU-4 measured at 77 K, 1 atm.

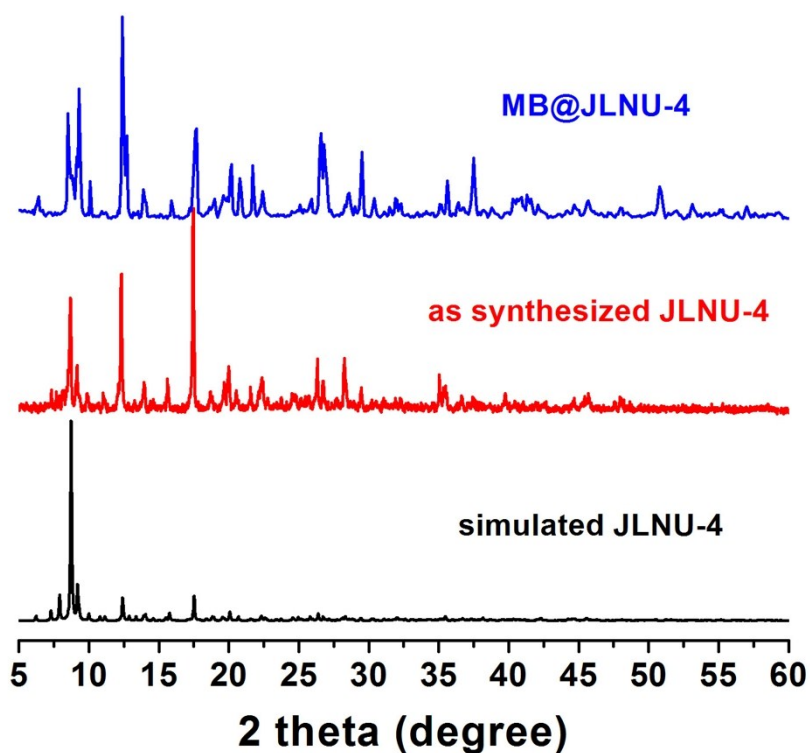

Fig. S16 XRPD patterns of simulated JLNU-4 (black), as-synthesized JLNU-4 (red) and after the absorption of MB (blue), respectively.

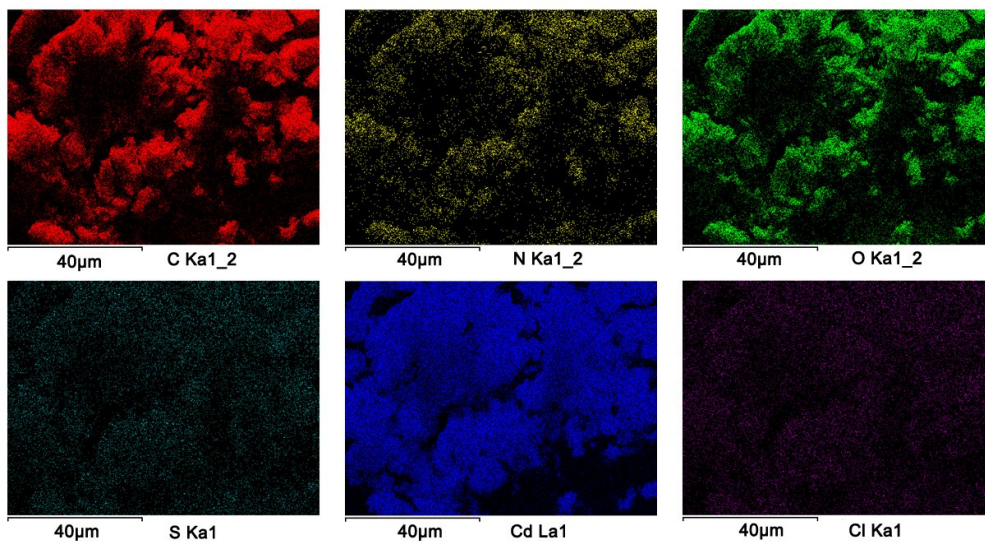

**Fig. S17** EDS images of MB loaded JLNU-4.

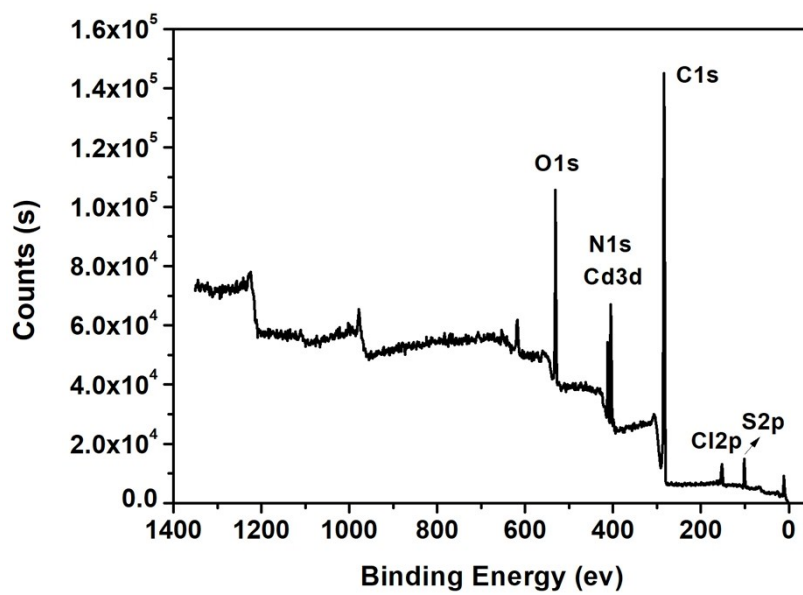

**Fig. S18** XPS spectrum of contained elements for MB loaded JLNU-4.

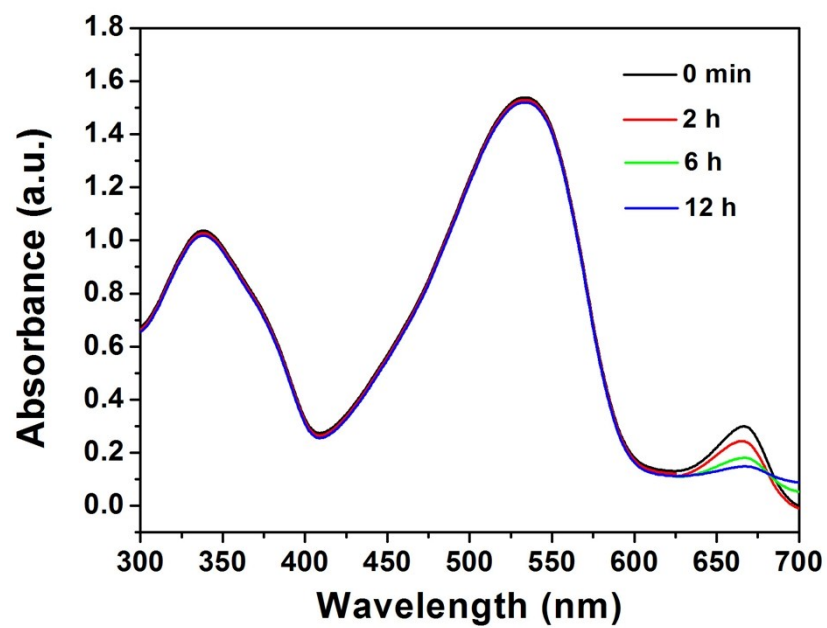

**Fig. S19** UV/vis spectra of the effluent during the dye mixture of MB and CR passing through the MOF-filled chromatographic column.
